# Supplementary material for: Effects of Suspended Particles on Exopolysaccharide Secretion of Two Microalgae in Jinjiang Estuary (Fujian, China)
Source: MDPI journal article supplement (doi:10.3390/jmse10020277), 2022-02-17
Supplement: s1 [file s1]

# Supplementary material for “Effects of Suspended Particles on Exopolysaccharide Secretion of Two Microalgae in Jinjiang Estuary (Fujian, China)”

**Table S1.** The composition of BG11 medium.

| Composition                                        | Concentration(g/L) | Composition                                           | Concentration(g/L) |
|----------------------------------------------------|--------------------|-------------------------------------------------------|--------------------|
| NaNO <sub>3</sub>                                  | 150.00             | Na <sub>2</sub> CO <sub>3</sub>                       | 20.00              |
| K <sub>2</sub> HPO <sub>4</sub> ·7H <sub>2</sub> O | 30.00              | Co (NO <sub>3</sub> ) <sub>3</sub> ·6H <sub>2</sub> O | 0.049              |
| MgSO <sub>4</sub> ·7H <sub>2</sub> O               | 75.00              | NaMoO <sub>4</sub> ·5H <sub>2</sub> O                 | 0.39               |
| CaCl <sub>2</sub> ·2H <sub>2</sub> O               | 36.00              | H <sub>3</sub> BO <sub>3</sub>                        | 2.86               |
| C <sub>6</sub> H <sub>8</sub> O <sub>7</sub>       | 6.00               | MnCl <sub>2</sub> ·4H <sub>2</sub> O                  | 1.81               |
| C <sub>6</sub> H <sub>8</sub> FeNO <sub>7</sub>    | 6.00               | ZnSO <sub>4</sub> ·7H <sub>2</sub> O                  | 0.22               |
| Na <sub>2</sub> EDTA                               | 1.00               | CuSO <sub>4</sub> ·5H <sub>2</sub> O                  | 0.079              |

**Table S2.** The main apparatus of the experiment.

| Name                                        | Model        | Vendor                                               |
|---------------------------------------------|--------------|------------------------------------------------------|
| artificial climate box                      | PYX-250Q-B   | Jingyixingye Science and Technology Co., LTD         |
| refrigerated tabletop centrifuge            | TGL-20M      | Xiangyi Centrifuge Instrument Co., LTD               |
| UV–visible spectrophotometer                | UV-2800AH    | Unico (Shanghai) Instrument Co., LTD                 |
| high-pressure steam sterilization           | YXQ-SG41-280 | Shanghai Huaxian Medical Nuclear Instrument Co., LTD |
| Clean bench                                 | SW-CJ-1F     | Shanghai Boxun Industry & Commerce Co., LTD          |
| pipettor                                    | Thermo       | Thermoelectric Instruments Co., LTD                  |
| electrically heated thermostatic water bath | DK-826       | Shanghai Precision Experimental Equipment Factory    |
| pot                                         |              |                                                      |
| Phyto-PAM                                   | Phyto-PAM ED | Walz                                                 |
